# Supplementary material
Source: HighWire-hosted journal article supplement (https://bmjopen.bmj.com/content/6/3/e010133)
Supplement: inline-supplementary-material-1 [file inline-supplementary-material-1.pdf]

## APPENDIX

### 1. Search strategy (Medline)

1. (chronic disease\* or chronic illness\* or chronic medical condition\*).mp.
2. ((respiratory or pulmonary or lung) and (disease\* or illness\*)).mp.
3. exp asthma/ or asthma\*.mp.
4. ((bronchial\* or respiratory or airway or lung\*) adj3 (hypersensitiv\* or hyperreactiv\* or allerg\* or insufficiency)).mp.
5. ((bronchial spasm\* or bronchospasm\* or bronch\*) adj3 spasm\*).mp.
6. ((bronchoconstrict\* or bronch\*) adj3 constrict\*).mp.
7. or/1-6
8. exp influenza vaccine/
9. ((influenza\* or flu) and (vaccin\* or immuni\* or inocula\* or efficacy or effectiveness)).mp.
10. 8 and 9
11. (vaccin\* and (monovalent or bivalent or trivalent or quadrivalent or polyvalent or inactivated or live attenuated or recombinant or virosom\* or whole or subunit or split)).mp.
12. 10 or 11
13. 7 and 12
14. exp influenza/
15. (influenza\* or flu).mp.
16. exp Influenza A virus/ or exp Influenza B virus/
17. 14 and 15 and 16
18. ((laboratory confirmed or laboratory diagnosed) and (influenza\* or flu)).mp.
19. (real time polymerase chain reaction or reverse transcript\* polymerase chain reaction or RT-PCR or rapid influenza diagnostic test\* or fluorescent antibody test\* or serologic\* test\* or viral culture\*).mp.
20. (hospitaliz\* or hospitalis\*).mp.
21. mortality.mp.
22. asthma exacerbation\*.mp.
23. (influenza like illness or flu like illness or ILI).mp.
24. (primary care visit\* or primary care consultation\* or GP visit\*).mp.
25. (vaccin\* and (adverse event\* or adverse effect\*)).mp.
26. or/17-25
27. 13 and 26
28. Animals/
29. Humans/
30. 28 not (28 and 29)
31. 27 not 30
32. limit 31 to yr="1970 -Current"
